# Supplementary material for: Dosage effect of multiple genes accounts for multisystem disorder of myotonic dystrophy type 1
Source: PubMed Central journal article supplement (PMC7015062; doi:10.1038/s41422-019-0264-2), 2019-12-18
Supplement: 41422_2019_264_MOESM3_ESM.pdf [file 41422_2019_264_MOESM3_ESM.pdf]

## Supplementary information, Figure S3

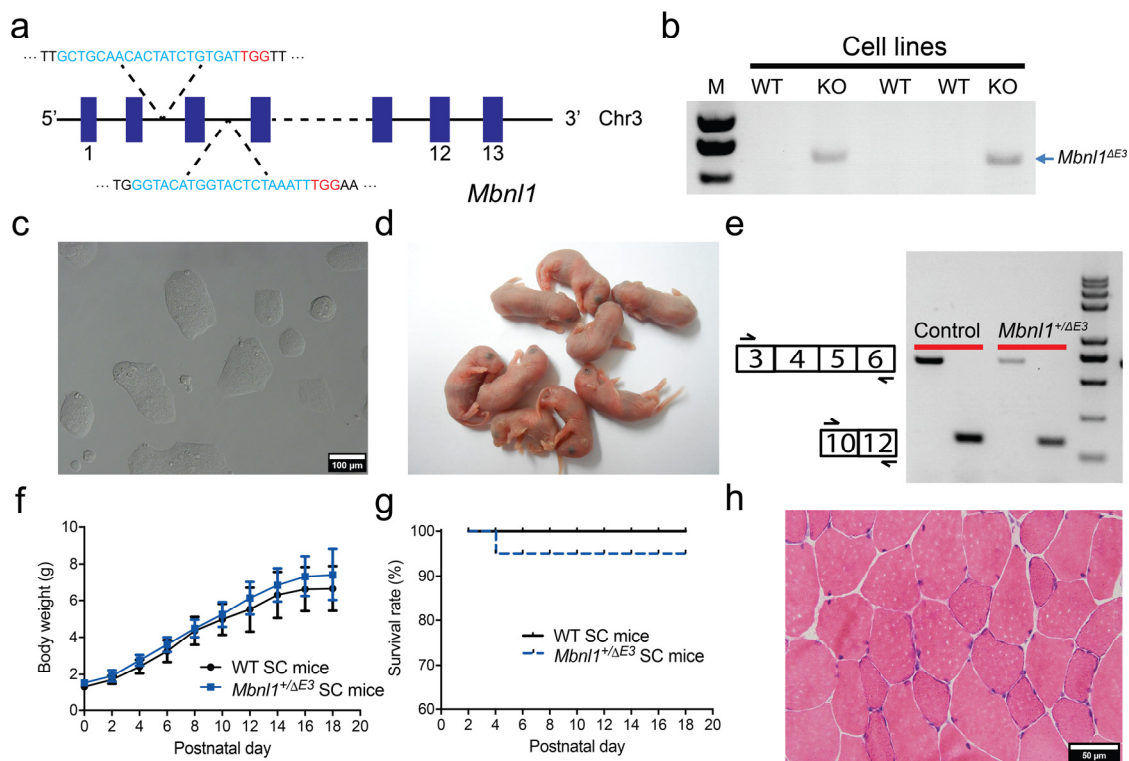

**Fig. S3** Generation of *Mbn1*<sup>+ΔE3</sup> SC mice through ICAHCI of haploid cells carrying mutant *Mbn1*. **a** Schematic of two sgRNAs for removing exon 3 of *Mbn1*. **b** Genotyping analysis of *Mbn1*<sup>ΔE3</sup>-O48 cell lines. **c** Phase-contrast image of *Mbn1*<sup>ΔE3</sup>-O48-2 cells. Scale bar, 100 μm. **d** Newborn SC pups generated from *Mbn1*<sup>ΔE3</sup>-O48-2 cells. **e** RT-PCR of *Mbn1* in skeletal muscles from *Mbn1*<sup>+ΔE3</sup> and WT SC mice. **f** Body weight analysis of *Mbn1*<sup>+ΔE3</sup> and WT SC mice ( $n > 8$  per group, means  $\pm$  SD). **g** Survival curves of *Mbn1*<sup>+ΔE3</sup> and WT SC mice ( $n > 8$  per group). **h** Representative image of H&E staining of TA muscles from *Mbn1*<sup>+ΔE3</sup> SC mouse. Scale bar, 50 μm.
