# Supplementary material for: Dosage effect of multiple genes accounts for multisystem disorder of myotonic dystrophy type 1
Source: PubMed Central journal article supplement (PMC7015062; doi:10.1038/s41422-019-0264-2), 2019-12-18
Supplement: 41422_2019_264_MOESM4_ESM.pdf [file 41422_2019_264_MOESM4_ESM.pdf]

## Supplementary information, Figure S4

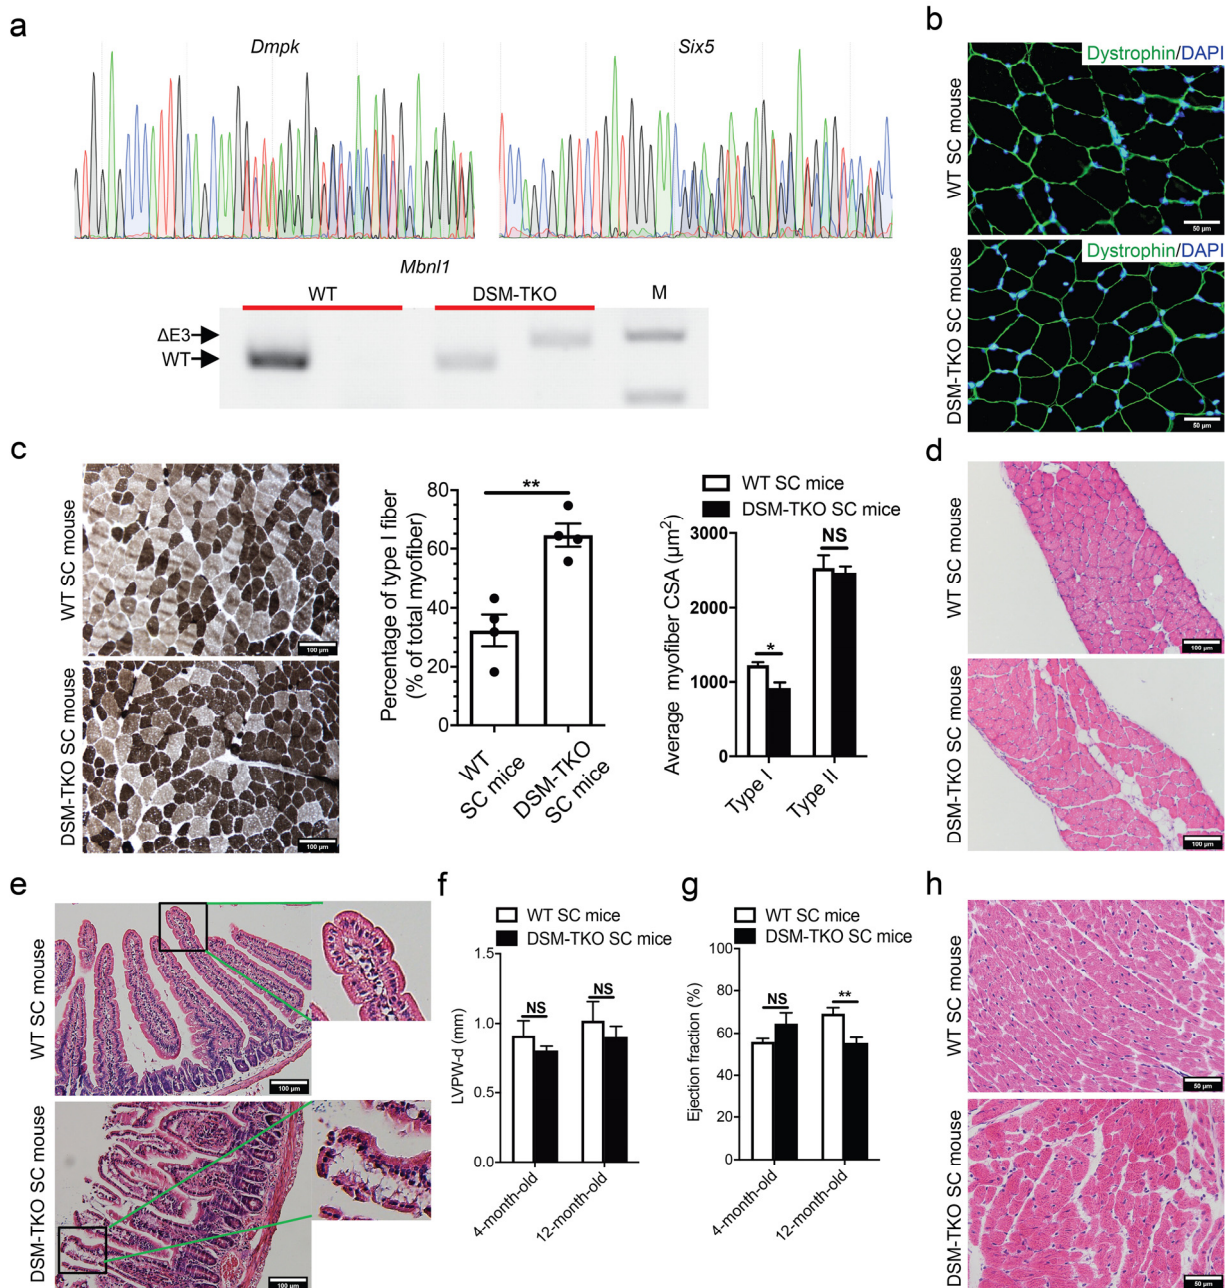

**Fig. S4** DM1-associated phenotypes in adult DSM-TKO SC mice. **a** Genotyping analysis of TKO SC mice. **b** Immunofluorescent staining of dystrophin (green) in DSM-TKO and WT SC mice. Scale bars, 50  $\mu\text{m}$ . **c** ATPase staining showing the increased ratio and reduced CSA of type I myofiber (darker cells) in TKO SC mice ( $n = 4$  per group). Unpaired Student's  $t$ -test,  $**P <$

0.01. NS, no significant differences. Scale bars, 100  $\mu\text{m}$ . **d** H&E staining of diaphragm showing increased fat cell invasion in TKO SC mice. Scale bars, 100  $\mu\text{m}$ . **e** Histological analysis of small intestine. Boxes in left panels are magnified in right panels, showing disorganization of intestine villi in TKO SC mice. Scale bars, 100  $\mu\text{m}$ . **f** IVPW-d thickness (diastole) of DSM-TKO and WT SC mice at different ages ( $n = 5$  per group). IVPW: left ventricular posterior wall. Unpaired Student's *t*-test. NS, no significant differences. **g** Reduced ejection fraction in 12-month-old DSM-TKO SC mice ( $n = 5$  per group). Unpaired Student's *t*-test,  $**P < 0.01$ . NS, no significant differences. **h** Myocardial disarray shown in the 12-month-old TKO SC mouse. Scale bars, 50  $\mu\text{m}$ .
