# Supplementary material for: Dosage effect of multiple genes accounts for multisystem disorder of myotonic dystrophy type 1
Source: PubMed Central journal article supplement (PMC7015062; doi:10.1038/s41422-019-0264-2), 2019-12-18
Supplement: 41422_2019_264_MOESM6_ESM.pdf [file 41422_2019_264_MOESM6_ESM.pdf]

## Supplementary information, Figure S6

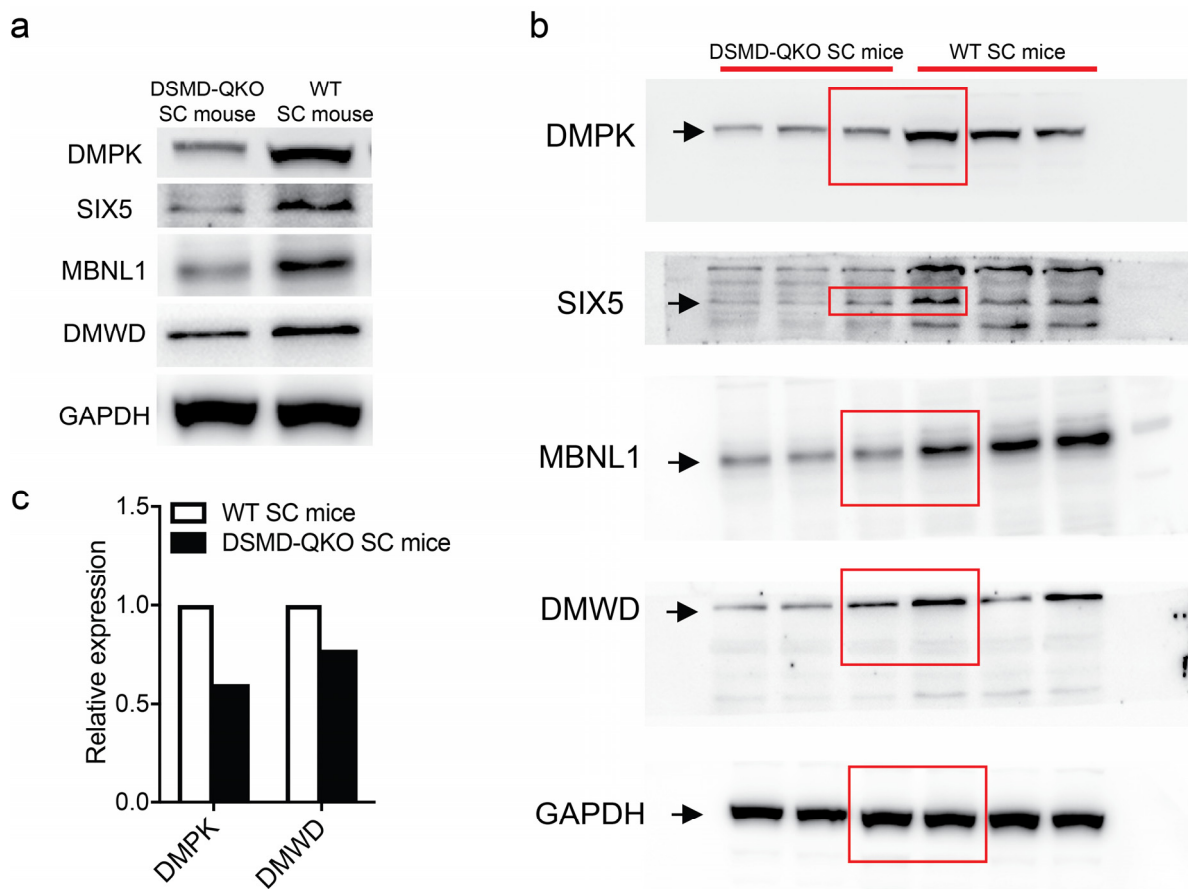

**Fig. S6** Protein level analysis of DMPK, SIX5, MBNL1 and DMWD in adult DSMD-QKO SC mice. **a** Western blotting of DMPK, SIX5, MBNL1 and DMWD in the TA muscle of adult QKO and WT SC mice. **b** The original gels of **a**. The red box shown in **a**. **c** Semi-quantitative analysis of the expression of DMPK (stomach) and DMWD (brain) of DSMD-QKO SC mice and WT SC mice using mass spectrometry.
