# Supplementary material for: Dosage effect of multiple genes accounts for multisystem disorder of myotonic dystrophy type 1
Source: PubMed Central journal article supplement (PMC7015062; doi:10.1038/s41422-019-0264-2), 2019-12-18
Supplement: 41422_2019_264_MOESM9_ESM.pdf [file 41422_2019_264_MOESM9_ESM.pdf]

## Supplementary information, Figure S9

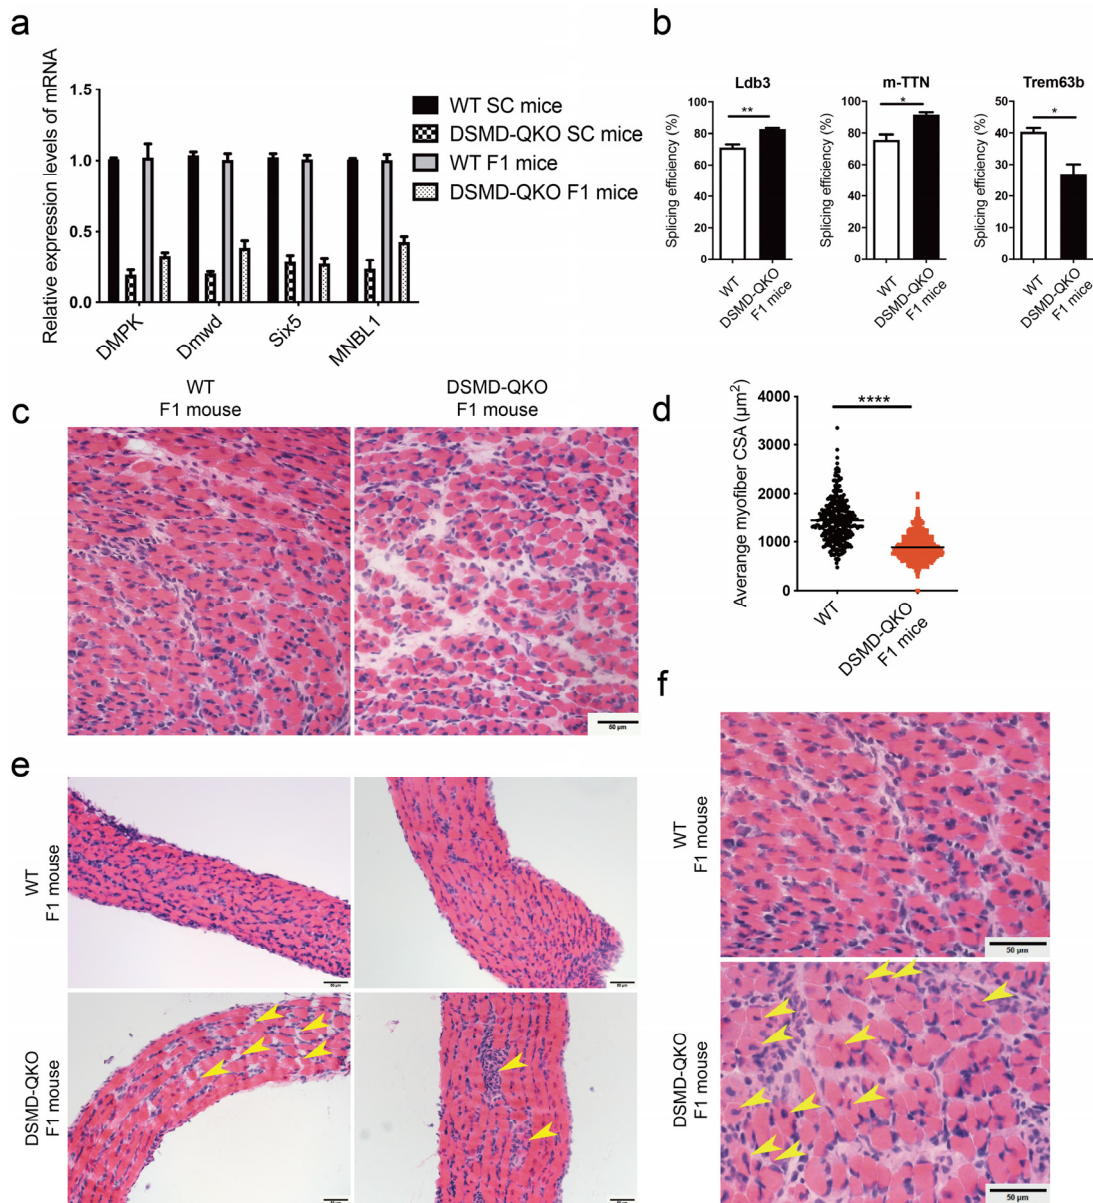

**Fig. S9** Phenotype analysis of QKO F1 mice. **a** Relative mRNA expression levels of target genes in QKO SC and F1 mice. **b** Splicing efficiency of three target pre-mRNAs in TA muscle of QKO and WT F1 mice. Unpaired Student's *t*-test, \* $P < 0.05$ , \*\* $P < 0.01$ . **c** H&E staining of TA muscle sections from DSMD-QKO and WT F1 mice (P0). Scale bar, 50  $\mu\text{m}$ . **d** Myofiber CSA analysis in QKO F1 mice (P0) ( $n = 3$  per group). Unpaired Student's *t*-test, \*\*\*\* $P < 0.0001$ . **e**

Representative images of diaphragm in QKO F1 mice (P0). Yellow arrows indicate nuclear clumps (bottom right) and loose construction (bottom left) in diaphragm. Scale bars, 50  $\mu\text{m}$ . **f**

Representative images of myofibers with central nuclei from TA muscle in QKO F1 mice (P0).

Yellow arrows indicate the myofibers with central nuclei. Scale bars, 50  $\mu\text{m}$ .
