# Supplementary material for: Dosage effect of multiple genes accounts for multisystem disorder of myotonic dystrophy type 1
Source: PubMed Central journal article supplement (PMC7015062; doi:10.1038/s41422-019-0264-2), 2019-12-18
Supplement: 41422_2019_264_MOESM10_ESM.pdf [file 41422_2019_264_MOESM10_ESM.pdf]

## Supplementary information, Figure S10

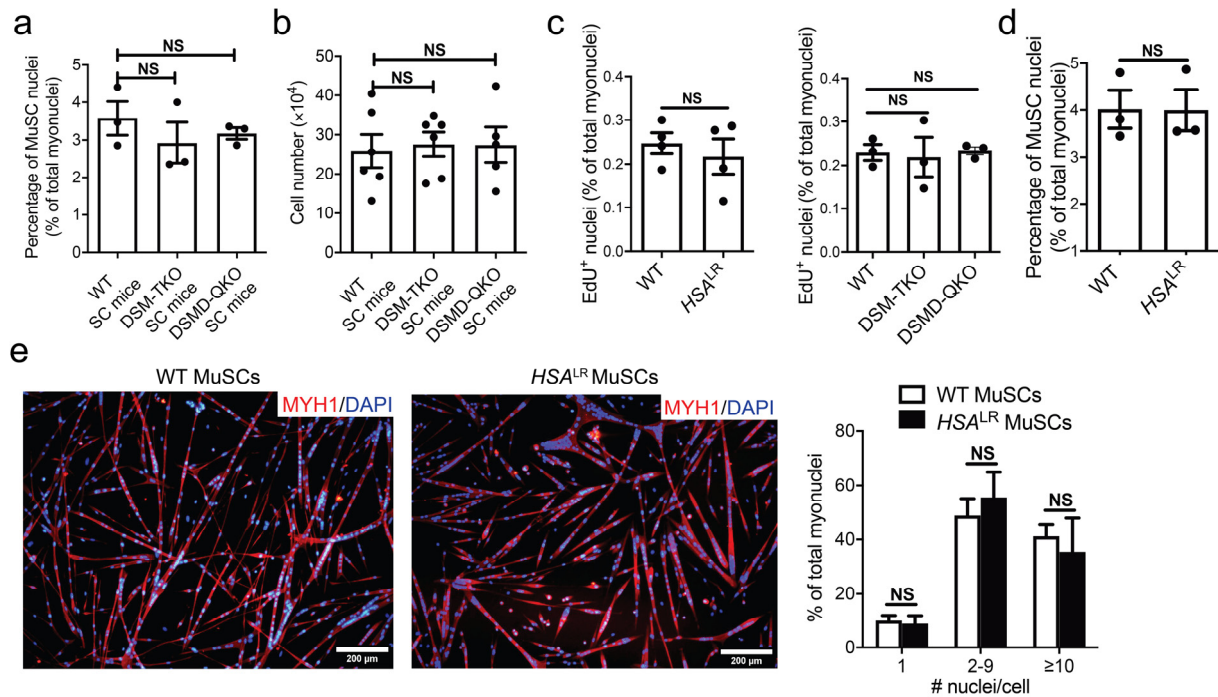

**Fig. S10** Normal MuSC number and proliferation in TKO and QKO mice. **a** FACS analysis showing equivalent numbers of MuSCs in TKO, QKO and WT SC mice ( $n = 3$  per group). Unpaired Student's *t*-test. NS, no significant differences. **b** The proliferation ability of cultured MuSCs ( $n = 5$  or  $6$  per group). Unpaired Student's *t*-test. NS, no significant differences. **c** *In vitro* proliferation ability of MuSCs isolated from *HSA<sup>LR</sup>*, TKO, QKO and WT mice ( $n = 3$  or  $4$  per group). **d** Equivalent number of MuSCs in *HSA<sup>LR</sup>* (FVB/n background) and WT mice (FVB/n background) ( $n = 3$  per group). Unpaired Student's *t*-test. NS, no significant differences. **e** *In vitro* differentiation potential of *HSA<sup>LR</sup>* and WT MuSCs. Scale bars, 200  $\mu$ m. Unpaired Student's *t*-test. NS, no significant differences.
