# Supplementary material for: Dosage effect of multiple genes accounts for multisystem disorder of myotonic dystrophy type 1
Source: PubMed Central journal article supplement (PMC7015062; doi:10.1038/s41422-019-0264-2), 2019-12-18
Supplement: 41422_2019_264_MOESM11_ESM.pdf [file 41422_2019_264_MOESM11_ESM.pdf]

## Supplementary information, Figure S11

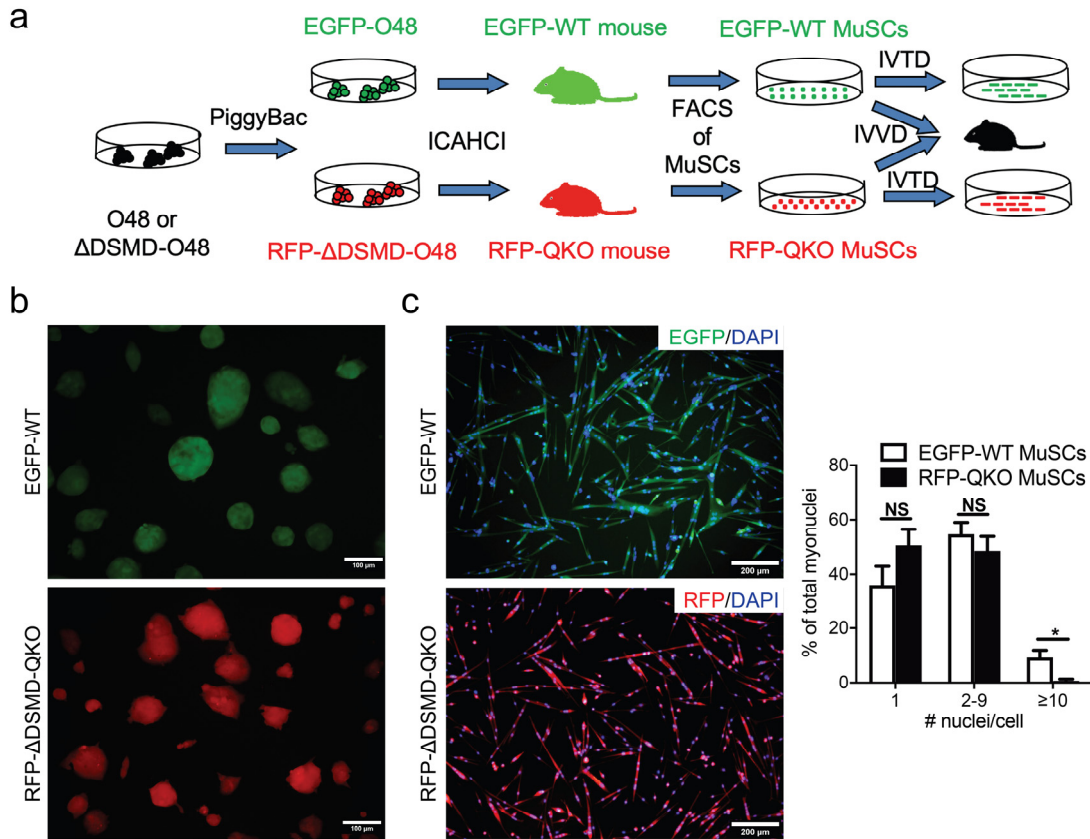

**Fig. S11** Differentiation analysis of DSMD-QKO MuSCs. **a** Schematic diagram of *in vivo* differentiation assay of QKO (red fluorescence) and WT (green fluorescence) MuSCs. IVTD, *in vitro* differentiation. IVVD, *in vivo* differentiation. **b** Representative images of RFP- $\Delta$ DSMD-O48 and EGFP-O48 haploid ESCs. Scale bars, 100  $\mu$ m. **c** *In vitro* differentiation of RFP-QKO and EGFP-WT MuSCs. Unpaired Student's *t*-test. \* $P < 0.05$ . NS, no significant changes. Scale bars, 200  $\mu$ m.
