# Supplementary material for: Dosage effect of multiple genes accounts for multisystem disorder of myotonic dystrophy type 1
Source: PubMed Central journal article supplement (PMC7015062; doi:10.1038/s41422-019-0264-2), 2019-12-18
Supplement: 41422_2019_264_MOESM12_ESM.pdf [file 41422_2019_264_MOESM12_ESM.pdf]

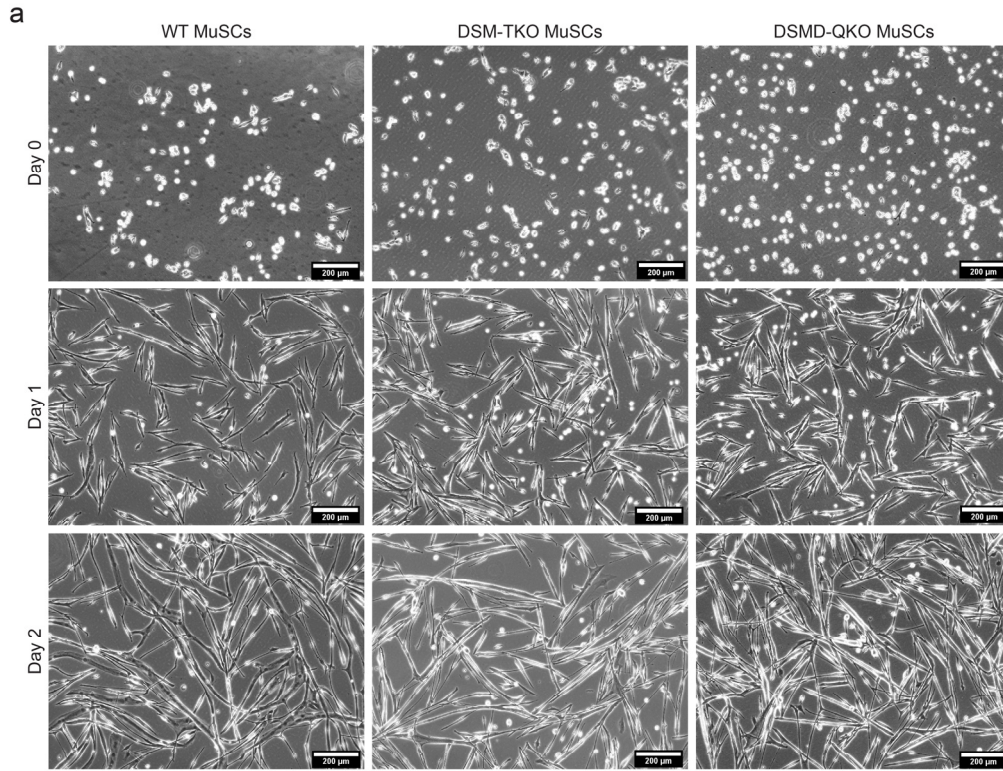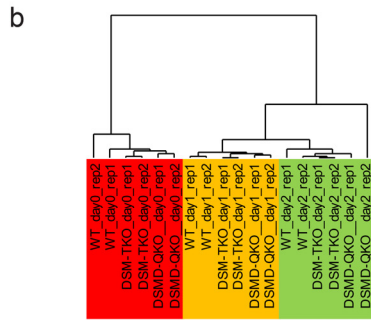

**c**

| Term                                                     | PValue   |
|----------------------------------------------------------|----------|
| GO:0006936~muscle contraction                            | 6.96E-12 |
| GO:0007275~multicellular organism development            | 3.18E-09 |
| GO:0086004~regulation of cardiac muscle cell contraction | 3.89E-08 |
| GO:0006874~cellular calcium ion homeostasis              | 1.08E-07 |
| GO:0060048~cardiac muscle contraction                    | 1.98E-07 |
| GO:0007517~muscle organ development                      | 2.25E-07 |
| GO:0006816~calcium ion transport                         | 8.52E-07 |
| GO:0030324~lung development                              | 1.18E-06 |
| GO:0002027~regulation of heart rate                      | 2.44E-06 |
| GO:0006811~ion transport                                 | 3.07E-06 |

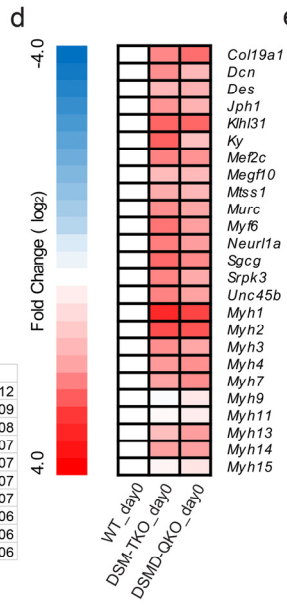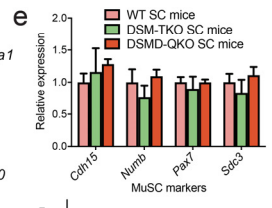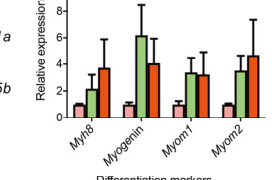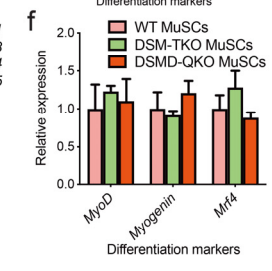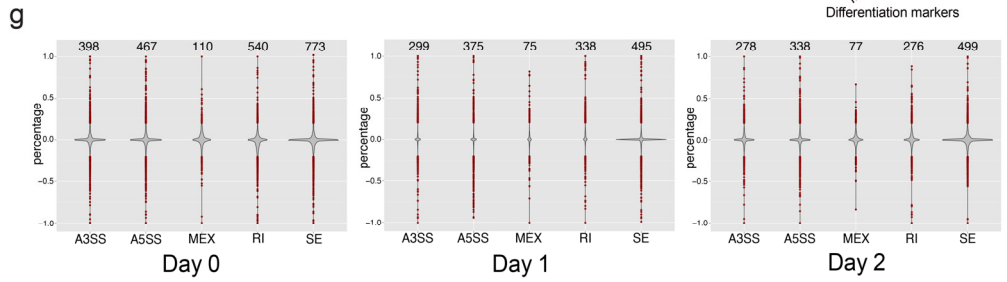

**Fig. S12** Reduced stemness in MuSCs of TKO and QKO SC mice. **a** Representative images of MuSCs (Day 0) and cells on the first and second day post differentiation (Day 1 and Day 2) used for RNA-seq analyses. Scale bars, 200  $\mu$ m. **b** Genomic expression profiles of MuSCs (Day 0) and differentiating cells (Day 1 and Day 2). **c** GO analysis of upregulated genes in TKO and QKO cells compared with WT cells. **d** Heat map analysis of differentiation markers between DM1 MuSCs and WT MuSCs (Day 0). **e** RT-PCR analysis of representative genes of self-renewal and differentiation in MuSCs. The expression values (means  $\pm$  SD) were normalized to that of *Gapdh*. **f** RT-PCR of differentiation markers in differentiating cells from MuSCs two days post differentiation. **g** Alternative splicing event analysis in MuSCs (Day 0) and differentiating cells (Day 1 and Day 2). A3SS, alternative 3' splice site; A5SS, alternative 5' splice site; MEX, mutually exclusive exons; RI, retained intron; SE, skipped exon.
