# Supplementary material for: Dosage effect of multiple genes accounts for multisystem disorder of myotonic dystrophy type 1
Source: PubMed Central journal article supplement (PMC7015062; doi:10.1038/s41422-019-0264-2), 2019-12-18
Supplement: 41422_2019_264_MOESM13_ESM.pdf [file 41422_2019_264_MOESM13_ESM.pdf]

## Supplementary information, Table S1

**Table S1** Development of ICAHCI embryos derived from haploid ESCs with single, triple or quadruple mutations.

| Haploid ESC lines used for ICAHCI (the number of cell lines tested) | Passage number | No. of SC embryos transferred (2-cell) | No. of SC pups (% of transferred embryos) | No. of SC pups surviving to P2 (% of birth) | No. of pups surviving to three weeks (% of P2) | No. of pups surviving to adult (% of P2) |
|---------------------------------------------------------------------|----------------|----------------------------------------|-------------------------------------------|---------------------------------------------|------------------------------------------------|------------------------------------------|
| O48                                                                 | P43-P51        | 430                                    | 55 (12.8)                                 | 52 (94.5)                                   | 52 (100)                                       | 50 (96.2)                                |
| $\Delta$ Dmpk-O48 (2)                                               | P41-43         | 192                                    | 26 (13.5)                                 | 24 (91.6)                                   | 22 (91.6)                                      | 21 (87.5)                                |
| $\Delta$ Six5-O48 (2)                                               | P40            | 156                                    | 15 (9.6)                                  | 13 (86.7)                                   | 13 (100)                                       | 12 (92.3)                                |
| $\Delta$ Mbnl1-O48 (2)                                              | P40-P42        | 200                                    | 19 (9.5)                                  | 19 (100)                                    | 18 (94.7)                                      | 18 (94.7)                                |
| $\Delta$ DMWD-O48 (2)                                               | P46-47         | 330                                    | 31 (9.4)                                  | 30 (96.8)                                   | 26 (86.7)                                      | 25 (83.3)                                |
| DSM-TKO-O48 (2)                                                     | P57-P62        | 270                                    | 34 (12.6)                                 | 32 (94.1)                                   | 30 (93.8)                                      | 30 (93.8)                                |
| DSMD-QKO-O48 (3)                                                    | P66-71         | 372                                    | 45 (12.1)                                 | 35 (77.8)                                   | 19 (54.3)                                      | 17 (48.6)                                |
