# Supplementary material for: Dosage effect of multiple genes accounts for multisystem disorder of myotonic dystrophy type 1
Source: PubMed Central journal article supplement (PMC7015062; doi:10.1038/s41422-019-0264-2), 2019-12-18
Supplement: 41422_2019_264_MOESM14_ESM.pdf [file 41422_2019_264_MOESM14_ESM.pdf]

## Supplementary information, Table S2

**Table S2** Off-target analysis of TKO and QKO cells.

| sgRNAs of targeted genes | No. of mismatch | No. of found targets (gene) | No. of mutated sites | Cell lines analyzed |
|--------------------------|-----------------|-----------------------------|----------------------|---------------------|
| Dmpk                     | 0               | 1 ( <i>Dmpk</i> )           | 1                    | ΔDSM-O48-1          |
|                          | 1               | 0                           | 0                    | ΔDSMD-O48-2         |
|                          | 2               | 1                           | 0                    |                     |
|                          | 3               | 21                          | 0                    |                     |
|                          | 4               | 275                         | 0                    |                     |
| Six5                     | 0               | 1 ( <i>Six5</i> )           | 1                    | ΔDSM-O48-1          |
|                          | 1               | 0                           | 0                    | ΔDSMD-O48-2         |
|                          | 2               | 0                           | 0                    |                     |
|                          | 3               | 16                          | 0                    |                     |
|                          | 4               | 186                         | 0                    |                     |
| Mbnl1-up                 | 0               | 1 ( <i>Mbnl1</i> )          | 1                    | ΔDSM-O48-1          |
|                          | 1               | 0                           | 0                    | ΔDSMD-O48-2         |
|                          | 2               | 1                           | 0                    |                     |
|                          | 3               | 11                          | 0                    |                     |
|                          | 4               | 220                         | 0                    |                     |
| Mbnl1-down               | 0               | 1 ( <i>Mbnl1</i> )          | 1                    | ΔDSM-O48-1          |
|                          | 1               | 0                           | 0                    | ΔDSMD-O48-2         |
|                          | 2               | 0                           | 0                    |                     |
|                          | 3               | 13                          | 0                    |                     |
|                          | 4               | 198                         | 0                    |                     |
| Dmwd                     | 0               | 1 ( <i>Dmwd</i> )           | 1                    | ΔDSM-O48-1          |
|                          | 1               | 0                           | 0                    | ΔDSMD-O48-2         |
|                          | 2               | 4                           | 0                    |                     |
|                          | 3               | 40                          | 0                    |                     |
|                          | 4               | 415                         | 0                    |                     |
