# Supplementary material for: Dosage effect of multiple genes accounts for multisystem disorder of myotonic dystrophy type 1
Source: PubMed Central journal article supplement (PMC7015062; doi:10.1038/s41422-019-0264-2), 2019-12-18
Supplement: 41422_2019_264_MOESM15_ESM.pdf [file 41422_2019_264_MOESM15_ESM.pdf]

## Supplementary information, Table S3

**Table S3** Clinical features of DM1 and phenotypes in mouse disease models.

|                                                                                                                          | Skeletal muscle |         |          |           | Cardiac problems | Cataract | Endocrine disorders | Digestive system dysfunction | Congenital DM1 |                   |                     | Defective satellite cells | References    |
|--------------------------------------------------------------------------------------------------------------------------|-----------------|---------|----------|-----------|------------------|----------|---------------------|------------------------------|----------------|-------------------|---------------------|---------------------------|---------------|
|                                                                                                                          | Myotonic        | Wasting | Weakness | Histology |                  |          |                     |                              | Hypotonia      | Breathing problem | Developmental delay |                           |               |
| Clinical features                                                                                                        | +++             | +++     | ++       | +++       | ++               | ++       | ++                  | ++                           | ++             | ++                | ++                  | +                         | [1]           |
| <i>Dmpk</i> <sup>-/-</sup>                                                                                               | -               | -       | -        | +         | -                | -        | ND                  | ND                           | -              | -                 | -                   | ND                        | [2, 3]        |
| <i>Six5</i> <sup>-/-</sup>                                                                                               | -               | -       | -        | -         | -                | +        | ND                  | ND                           | -              | -                 | -                   | ND                        | [4, 5]        |
| <i>HSA</i> <sup>LR</sup> (TG)                                                                                            | +++             | -       | -        | ++        | -                | -        | ND                  | ND                           | -              | -                 | -                   | ND                        | [6]           |
| <i>Mbnl1</i> <sup>-/-</sup>                                                                                              | +++             | -       | -        | ++        | -                | +++      | ND                  | ND                           | -              | -                 | -                   | ND                        | [7]           |
| <i>Mbnl1</i> <sup>-/-</sup> ; <i>Mbnl2</i> <sup>C/C</sup> ; <i>Myog-Cre</i> <sup>+/-</sup>                               | ND              | ++      | +++      | +++       | ND               | ND       | ND                  | ND                           | -              | +                 | +                   | ND                        | [8]           |
| <i>Mbnl1</i> <sup>-/-</sup> ; <i>Mbnl2</i> <sup>C/C</sup> ; <i>Mbnl3</i> <sup>C/C</sup> ; <i>Myog-Cre</i> <sup>+/-</sup> | ND              | +++     | +++      | +++       | ND               | ND       | ND                  | ND                           | +              | ++                | ++                  | ND                        | [8]           |
| <i>DMPK</i> <sup>+/-</sup>                                                                                               | -               | -       | ND       | -         | -                | -        | -                   | -                            | ND             | -                 | -                   | -                         | In this study |
| <i>SIX5</i> <sup>+/-</sup>                                                                                               | ND              | -       | ND       | -         | -                | -        | -                   | +                            | ND             | -                 | -                   | -                         | In this study |
| <i>MBNL1</i> <sup>+/-</sup>                                                                                              | ND              | -       | ND       | -         | -                | -        | -                   | -                            | ND             | -                 | -                   | -                         | In this study |
| <i>DMWD</i> <sup>+/-</sup>                                                                                               | ND              | +       | ND       | -         | -                | -        | -                   | -                            | ND             | -                 | -                   | -                         | In this study |
| DSM-TKO                                                                                                                  | +               | ++      | ++       | +         | +                | -        | +                   | +                            | -              | -                 | -                   | +                         | In this study |
| DSMD-QKO                                                                                                                 | +               | ++      | ++       | +         | ++               | +        | +                   | +                            | ++             | ++                | +                   | +                         | In this study |

-: No phenotype; +: Mild phenotype; ++: Moderate phenotype; +++: Severe phenotype; ND: No determined.

## References

1. Udd, B., and Krahe, R. (2012). The myotonic dystrophies: molecular, clinical, and therapeutic challenges. *The Lancet. Neurology* *11*, 891-905.
2. Jansen, G., Groenen, P.J., Bachner, D., Jap, P.H., Coerwinkel, M., Oerlemans, F., van den Broek, W., Gohlsch, B., Pette, D., Plomp, J.J., et al. (1996). Abnormal myotonic dystrophy protein kinase levels produce only mild myopathy in mice. *Nature genetics* *13*, 316-324.
3. Reddy, S., Smith, D.B., Rich, M.M., Leferovich, J.M., Reilly, P., Davis, B.M., Tran, K., Rayburn, H., Bronson, R., Cros, D., et al. (1996). Mice lacking the myotonic dystrophy protein kinase develop a late onset progressive myopathy. *Nature genetics* *13*, 325-335.
4. Klesert, T.R., Cho, D.H., Clark, J.I., Maylie, J., Adelman, J., Snider, L., Yuen, E.C., Soriano, P., and Tapscott, S.J. (2000). Mice deficient in Six5 develop cataracts: implications for myotonic dystrophy. *Nature genetics* *25*, 105-109.
5. Sarkar, P.S., Appukuttan, B., Han, J., Ito, Y., Ai, C., Tsai, W., Chai, Y., Stout, J.T., and Reddy, S. (2000). Heterozygous loss of Six5 in mice is sufficient to cause ocular cataracts. *Nature genetics* *25*, 110-114.
6. Mankodi, A., Logigian, E., Callahan, L., McClain, C., White, R., Henderson, D., Krym, M., and Thornton, C.A. (2000). Myotonic dystrophy in transgenic mice expressing an expanded CUG repeat. *Science* *289*, 1769-1773.
7. Kanadia, R.N., Johnstone, K.A., Mankodi, A., Lungu, C., Thornton, C.A., Esson, D., Timmers, A.M., Hauswirth, W.W., and Swanson, M.S. (2003). A muscleblind knockout model for myotonic dystrophy. *Science* *302*, 1978-1980.
8. Thomas, J.D., Sznajder, L.J., Bardhi, O., Aslam, F.N., Anastasiadis, Z.P., Scotti, M.M., Nishino, I., Nakamori, M., Wang, E.T., and Swanson, M.S. (2017). Disrupted prenatal RNA processing and myogenesis in congenital myotonic dystrophy. *Genes & development* *31*, 1122-1133.
