# Supplementary material for: Dosage effect of multiple genes accounts for multisystem disorder of myotonic dystrophy type 1
Source: PubMed Central journal article supplement (PMC7015062; doi:10.1038/s41422-019-0264-2), 2019-12-18
Supplement: 41422_2019_264_MOESM16_ESM.pdf [file 41422_2019_264_MOESM16_ESM.pdf]

## Supplementary information, Table S4

**Table S4** The primers used in this study.

| Primers name                   | Sequence (5'-3')         |
|--------------------------------|--------------------------|
| qPCR                           |                          |
| <i>Cdh15</i> -qPCR-f           | GTCACTCAGCCCAATGCTCT     |
| <i>Cdh15</i> -qPCR-r           | GAGCAGAGCAGAACCCATTG     |
| <i>Numb</i> -qPCR-f            | CTTCCCAGTTAAGTACCTCGGC   |
| <i>Numb</i> -qPCR-r            | CCCGTTTTTCCAAAGAAGCCT    |
| <i>Gapdh</i> -qPCR-f           | TGTGTCCGTCGTGGATCTGA     |
| <i>Gapdh</i> -qPCR-r           | CCTGCTTACCACCTTCTTGAT    |
| <i>Mrf4</i> -qPCR-f            | TGAGGGTGCGGATTCCTG       |
| <i>Mrf4</i> -qPCR-r            | CACGTTTGCTCCTCCTTCCT     |
| <i>MyoD</i> -qPCR-f            | GGCTACGACACCGCCTACTA     |
| <i>MyoD</i> -qPCR-r            | GTGGAGATGCGCTCCACTAT     |
| <i>Myogenin</i> -qPCR-f        | GAGACATCCCCCTATTTCTACCA  |
| <i>Myogenin</i> -qPCR-r        | GCTCAGTCCGTCATAGCC       |
| <i>Myh8</i> -qPCR-f            | GGAGAGGATTGAGGCCCAAAA    |
| <i>Myh8</i> -qPCR-r            | CACGGTCACTTTCCTCCATC     |
| <i>Myom1</i> -qPCR-f           | GCACGACCATGAGCCACTAC     |
| <i>Myom1</i> -qPCR-r           | ACCCTTGAGAATGCCGGGA      |
| <i>Myom2</i> -qPCR-f           | AAAAGACACAAGCACTTTGACCA  |
| <i>Myom2</i> -qPCR-r           | TGGGAGGATGACTGGGTGG      |
| <i>Pax7</i> -qPCR-f            | GACGACGAGGAAGGAGACAA     |
| <i>Pax7</i> -qPCR-r            | ACATCTGAGCCCTCATCCAG     |
| <i>Sdc3</i> -qPCR-f            | AGAGGCCGGTGGATCTTGA      |
| <i>Sdc3</i> -qPCR-r            | CTCCTGCTCGAAGTAGCCAGA    |
| CRISPR-Cas9 targeting sequence |                          |
| <i>Dmpk</i> -sgRNA-f           | CACCGCCATTGCAGCAAGGCTTA  |
| <i>Dmpk</i> -sgRNA-r           | AAACTAAGCCTTGCTGCAATGGGC |
| <i>Six5</i> -sgRNA-f           | CACCGTCTGATGGGAACCCACTA  |
| <i>Six5</i> -sgRNA-r           | TAGTGGGGTTCCCATCAGAC     |
| <i>Mbnl1</i> -up-sgRNA-f       | CACCGCTGCAACACTATCTGTGAT |
| <i>Mbnl1</i> -up-sgRNA-r       | AAACATCACAGATAGTGTTGCAGC |
| <i>Mbnl1</i> -down-sgRNA-f     | CACCGGTACATGGTACTCTAAATT |
| <i>Mbnl1</i> -down-sgRNA-r     | AAACAATTTAGAGTACCATGTACC |
| <i>Dmwd</i> -sgRNA-f           | CACCGGCTTCTACAAGCTGCTCCC |
| <i>Dmwd</i> -sgRNA-r           | AAACGGGAGCAGCTTGTAGAAGCC |
| Knockout mouse genotyping      |                          |
| <i>Dmpk</i> -test-f            | CACAGCTCCAGTTCGAGGTT     |
| <i>Dmpk</i> -test-r            | AGATGACAGCAAGAGGTGGC     |
| <i>Six5</i> -test-f            | CCCAGCAGGCTTGTAGAGAC     |
| <i>Six5</i> -test-r            | GCCAGGAAGCTCCCATTAC      |

|                                       |                               |
|---------------------------------------|-------------------------------|
| <i>Mbnl1</i> -test-f                  | AGAACCAGAGGGAAAGCAGC          |
| <i>Mbnl1</i> -test-r                  | GAGGCATGGAGTTCGGAGTT          |
| <i>Mbnl1</i> -wt-f                    | CAGCCTCTGCTTTTGCCCTTG         |
| <i>Mbnl</i> -wt-r                     | CGTGTGCTCAGTAACCCCTT          |
| <i>Dmwd</i> -test-f                   | CGCTGTGTGATCGTGTGCAT          |
| <i>Dmwd</i> -test-r                   | TGGTGTCTTTCTTGATGAGGTC        |
| Splicing analysis                     |                               |
| <i>Ldb3</i> -sp-f                     | GCGTCAACACAGACACCATGACC       |
| <i>Ldb3</i> -sp-r                     | TCATCTGGGCCAGGATGCGGAA        |
| <i>Sercal</i> -sp-f                   | GCTCATGGTCCTCAAGATCTCAC       |
| <i>Sercal</i> -sp-r                   | GGGTCAGTGCCTCAGCTTTG          |
| <i>m-TTN</i> -sp-f                    | GTGTGAGTCGCTCCAGAAACG         |
| <i>m-TTN</i> -sp-r                    | CCACCACAGGACCATGTTATTTT       |
| <i>Trem63b</i> -sp-f                  | CTGGCTCTGGACTTCATGTGCTTTC     |
| <i>Trem63b</i> -sp-r                  | GAGACGGAGGTGAGACGCTCATACC     |
| <i>Sorbs1</i> -sp-f                   | CCAGCTGATTACTTGGAGTCCACAGAAG  |
| <i>Sorbs1</i> -sp-r                   | GTTACCTTCATACCAGTTCTGGTCAATC  |
| <i>Spag9</i> -sp-f                    | GGACTGGAAATGGTGTCAATTATCTCCAT |
| <i>Spag9</i> -sp-r                    | GGGACTGCCACAAAGAATTTACAG      |
| <i>Dysf</i> -sp-f                     | CGAAAATCTCTGCTACTGGAGGAG      |
| <i>Dysf</i> -sp-r                     | TGTGTTGAGCTCTGCATAAGGATC      |
| <i>Mbnl1</i> -sp-f                    | ACACCTGCAAGCCAAGATCA          |
| <i>Mbnl1</i> -sp-r                    | TGTTAAAGACTGCGGTGGCA          |
| <i>HSA<sup>LR</sup></i> mice genotype |                               |
| MSA-f                                 | TCCTCAGGACGACAATCGAC          |
| MSA-r                                 | CCTAAGGAGTTCACCCAGTCTG        |
| HSA-f                                 | AAACTTACATCTTCCCATGCTCC       |
| HAS-r                                 | GAGACGCCCTCTGAGAAACAG         |
